# Supplementary material
Source: publisher figshare collection journal article supplement (https://gsajournals.figshare.com/ndownloader/files/26176898)
Supplement: Supplementary file 1 [file 26176898]

## Sheet: NA.Values.NCU
Table 5: Genes with NA entropy values
NCU Accession	Gene ID	Entropy Value	Annotation
NCU16303	gene19	NA	hypothetical protein
NCU16314	gene118	NA	hypothetical protein
NCU15008	gene237	NA	tRNA
NCU15011	gene294	NA	tRNA
NCU16332	gene306	NA	hypothetical protein
NCU14008	gene456	NA	ncRNA
NCU14010	gene495	NA	ncRNA
NCU15017	gene513	NA	tRNA
NCU15023	gene635	NA	tRNA
NCU10076	gene801	NA	hypothetical protein
NCU15027	gene836	NA	tRNA
NCU16392	gene1230	NA	hypothetical protein
NCU15031	gene1250	NA	tRNA
NCU14025	gene1419	NA	ncRNA
NCU07350	gene1528	NA	hypothetical protein
NCU10125	gene1546	NA	hypothetical protein
NCU14028	gene1587	NA	ncRNA
NCU16421	gene1614	NA	hypothetical protein
NCU15604	gene1726	NA	rRNA
NCU14032	gene1766	NA	ncRNA
NCU10770	gene1771	NA	hypothetical protein
NCU00760	gene1814	NA	hypothetical protein
NCU14034	gene1860	NA	ncRNA
NCU00695	gene1882	NA	hypothetical protein
NCU16447	gene1938	NA	hypothetical protein
NCU14044	gene2119	NA	ncRNA
NCU14047	gene2313	NA	ncRNA
NCU01829	gene3014	NA	hypothetical protein
NCU15269	gene3056	NA	tRNA
NCU16569	gene3252	NA	hypothetical protein
NCU14141	gene3323	NA	ncRNA
NCU09462	gene3539	NA	hypothetical protein
NCU15216	gene3641	NA	tRNA
NCU16618	gene3737	NA	hypothetical protein
NCU14114	gene4121	NA	ncRNA
NCU00143	gene4207	NA	hypothetical protein
NCU00149	gene4212	NA	hypothetical protein
NCU00179	gene4245	NA	hypothetical protein
NCU15238	gene4335	NA	tRNA
NCU15650	gene4426	NA	rRNA
NCU14121	gene4614	NA	ncRNA
NCU04933	gene5124	NA	nucleoside-diphosphate-sugar epimerase
NCU07964	gene5177	NA	cem-3, condensing enzyme (mitochondrial)-3
NCU07955	gene5186	NA	pod-1, mitochondrion biogenesis protein
NCU07912	gene5233	NA	hypothetical protein
NCU15153	gene5256	NA	tRNA
NCU16762	gene5279	NA	hypothetical protein
NCU14091	gene5312	NA	ncRNA
NCU16766	gene5327	NA	hypothetical protein
NCU16771	gene5389	NA	trn-3, tRNA-processing-3
NCU04515	gene5692	NA	hypothetical protein
NCU15171	gene5720	NA	tRNA
NCU07995	gene5919	NA	hypothetical protein
NCU14100	gene5968	NA	ncRNA
NCU07285	gene6111	NA	hypothetical protein
NCU15200	gene6233	NA	tRNA
NCU16891	gene6382	NA	hypothetical protein
NCU15611	gene6498	NA	rRNA
NCU14055	gene6573	NA	ncRNA
NCU03598	gene6886	NA	Septal pore-associated protein, putative
NCU01003	gene7122	NA	hypothetical protein
NCU01025	gene7142	NA	hypothetical protein
NCU15095	gene7171	NA	tRNA
NCU01123	gene7236	NA	hypothetical protein
NCU15107	gene7331	NA	tRNA
NCU15114	gene7515	NA	tRNA
NCU15116	gene7537	NA	tRNA
NCU06667	gene7583	NA	hypothetical protein
NCU14080	gene7638	NA	ncRNA
NCU15623	gene7643	NA	rRNA
NCU08933	gene7995	NA	cellular nucleic acid-binding protein
NCU09845	gene8045	NA	hypothetical protein
NCU07195	gene8132	NA	hypothetical protein
NCU15135	gene8138	NA	tRNA
NCU07183	gene8146	NA	hypothetical protein
NCU17049	gene8152	NA	hypothetical protein
NCU14166	gene8343	NA	ncRNA
NCU12085	gene8398	NA	hypothetical protein
NCU17101	gene8663	NA	hypothetical protein
NCU15687	gene8778	NA	rRNA
NCU14177	gene8819	NA	ncRNA
NCU15392	gene8887	NA	tRNA
NCU14179	gene8998	NA	ncRNA
NCU05052	gene9186	NA	hypothetical protein
NCU17145	gene9198	NA	hypothetical protein
NCU09284	gene9289	NA	hypothetical protein
NCU10703	gene9498	NA	hypothetical protein
NCU09420	gene9566	NA	hsp20, hsp20-like protein
NCU09409	gene9578	NA	mox-1, monooxygenase-1
NCU15340	gene9583	NA	tRNA
NCU10016	gene9604	NA	thermophilic desulfurizing enzyme family protein
NCU15335	gene9626	NA	tRNA
NCU15321	gene9741	NA	tRNA
NCU06074	gene9790	NA	hypothetical protein
NCU02451	gene9869	NA	mhr-2, mitochondrial hypoxia responsive domain-containing protein
NCU14149	gene10135	NA	ncRNA
NCU14145	gene10281	NA	ncRNA
NCU05892	gene10387	NA	hypothetical protein
